# Supplementary material
Source: PubMed Central journal article supplement (PMC5717194)

**SUPPLEMENTAL TABLE(S)**

| <b>Table S1. Apparent affinities of RTA mAbs used in this study</b> |                             |                       |                        |
|---------------------------------------------------------------------|-----------------------------|-----------------------|------------------------|
| <b>mAb</b>                                                          | <b>Ka(1/Ms)<sup>a</sup></b> | <b>Kd(1/s)</b>        | <b>KD (M)</b>          |
| PB10                                                                | 1.01X10 <sup>6</sup>        | 1.25X10 <sup>-6</sup> | 1.24X10 <sup>-12</sup> |
| WECB2                                                               | 1.13X10 <sup>6</sup>        | 3.50X10 <sup>-6</sup> | 3.10X10 <sup>-12</sup> |
| R70                                                                 | 7.20X10 <sup>5</sup>        | 1.39X10 <sup>-5</sup> | 1.94X10 <sup>-11</sup> |
| SyIH7                                                               | 4.15X10 <sup>5</sup>        | 8.44X10 <sup>-6</sup> | 2.03X10 <sup>-11</sup> |
| PA1                                                                 | 8.61X10 <sup>5</sup>        | 7.92X10 <sup>-6</sup> | 9.19X10 <sup>-12</sup> |
| PH12                                                                | 9.56X10 <sup>5</sup>        | 8.70X10 <sup>-6</sup> | 9.10X10 <sup>-12</sup> |
| TB12                                                                | 6.14X10 <sup>5</sup>        | 2.71X10 <sup>-5</sup> | 4.42X10 <sup>-11</sup> |
| IB2                                                                 | 2.71X10 <sup>6</sup>        | 1.33X10 <sup>-4</sup> | 4.93X10 <sup>-11</sup> |
| GD12                                                                | 2.22X10 <sup>5</sup>        | 1.22X10 <sup>-5</sup> | 5.52X10 <sup>-11</sup> |
| JD4                                                                 | 3.02X10 <sup>4</sup>        | 2.47X10 <sup>-5</sup> | 8.18X10 <sup>-10</sup> |

<sup>a</sup>, apparent binding association ( $k_a$ ) and dissociation ( $k_d$ ) rate constants, as well as apparent equilibrium dissociation constants ( $K_D$ ), were determined by surface plasmon resonance (SPR) using a the ProteOn XPR36 (Bio-Rad Inc., Hercules, CA). Apparent affinities were determined using IgG molecules, not Fab fragments with ricin toxin-coated GLC chips. Kinetic constants for the antibody/ricin interactions were fitted using the Langmuir 1:1 binding model available in the ProteOn Manager software 3.1.0 (Bio-Rad Inc.). The values shown here supersede previously reported kinetic values obtained using Biacore instrumentation.

**Table S2. RiVax peptic peptides**

| Amino acid residue # |       |     |
|----------------------|-------|-----|----------------------|-------|-----|----------------------|-------|-----|----------------------|-------|-----|
| Pep #                | start | end |
| <b>1</b>             | 1     | 11  | <b>36</b>            | 92    | 103 | <b>71</b>            | 162   | 168 | <b>106</b>           | 217   | 232 |
| <b>2</b>             | 12    | 20  | <b>37</b>            | 92    | 107 | <b>72</b>            | 165   | 168 | <b>107</b>           | 217   | 240 |
| <b>3</b>             | 12    | 24  | <b>38</b>            | 93    | 99  | <b>73</b>            | 165   | 171 | <b>108</b>           | 218   | 225 |
| <b>4</b>             | 21    | 24  | <b>39</b>            | 93    | 107 | <b>74</b>            | 168   | 171 | <b>109</b>           | 218   | 232 |
| <b>5</b>             | 25    | 32  | <b>40</b>            | 102   | 107 | <b>75</b>            | 169   | 173 | <b>110</b>           | 220   | 232 |
| <b>6</b>             | 25    | 37  | <b>41</b>            | 103   | 107 | <b>76</b>            | 172   | 181 | <b>111</b>           | 221   | 232 |
| <b>7</b>             | 28    | 37  | <b>42</b>            | 104   | 107 | <b>77</b>            | 175   | 181 | <b>112</b>           | 226   | 232 |
| <b>8</b>             | 33    | 59  | <b>43</b>            | 104   | 109 | <b>78</b>            | 178   | 181 | <b>113</b>           | 226   | 240 |
| <b>9</b>             | 37    | 59  | <b>44</b>            | 108   | 117 | <b>79</b>            | 182   | 186 | <b>114</b>           | 227   | 240 |
| <b>10</b>            | 38    | 45  | <b>45</b>            | 108   | 118 | <b>80</b>            | 182   | 187 | <b>115</b>           | 232   | 240 |
| <b>11</b>            | 38    | 55  | <b>46</b>            | 108   | 122 | <b>81</b>            | 182   | 188 | <b>116</b>           | 232   | 243 |
| <b>12</b>            | 38    | 57  | <b>47</b>            | 118   | 122 | <b>82</b>            | 182   | 190 | <b>117</b>           | 232   | 248 |
| <b>13</b>            | 38    | 59  | <b>48</b>            | 119   | 126 | <b>83</b>            | 182   | 204 | <b>118</b>           | 233   | 243 |
| <b>14</b>            | 56    | 59  | <b>49</b>            | 123   | 126 | <b>84</b>            | 187   | 204 | <b>119</b>           | 233   | 244 |
| <b>15</b>            | 58    | 61  | <b>50</b>            | 123   | 129 | <b>85</b>            | 188   | 204 | <b>120</b>           | 233   | 246 |
| <b>16</b>            | 58    | 68  | <b>51</b>            | 123   | 133 | <b>86</b>            | 189   | 204 | <b>121</b>           | 233   | 248 |
| <b>17</b>            | 60    | 68  | <b>52</b>            | 123   | 135 | <b>87</b>            | 189   | 206 | <b>122</b>           | 240   | 243 |
| <b>18</b>            | 60    | 69  | <b>53</b>            | 127   | 133 | <b>88</b>            | 191   | 204 | <b>123</b>           | 241   | 244 |
| <b>19</b>            | 62    | 68  | <b>54</b>            | 127   | 135 | <b>89</b>            | 191   | 207 | <b>124</b>           | 241   | 246 |
| <b>20</b>            | 69    | 72  | <b>55</b>            | 130   | 135 | <b>90</b>            | 195   | 204 | <b>125</b>           | 241   | 248 |
| <b>21</b>            | 69    | 73  | <b>56</b>            | 130   | 151 | <b>91</b>            | 205   | 210 | <b>126</b>           | 243   | 248 |
| <b>22</b>            | 69    | 74  | <b>57</b>            | 133   | 144 | <b>92</b>            | 205   | 214 | <b>127</b>           | 244   | 248 |
| <b>23</b>            | 70    | 74  | <b>58</b>            | 134   | 146 | <b>93</b>            | 205   | 216 | <b>128</b>           | 245   | 248 |
| <b>24</b>            | 72    | 79  | <b>59</b>            | 134   | 151 | <b>94</b>            | 205   | 217 | <b>129</b>           | 247   | 253 |
| <b>25</b>            | 72    | 91  | <b>60</b>            | 136   | 146 | <b>95</b>            | 207   | 214 | <b>130</b>           | 247   | 254 |
| <b>26</b>            | 73    | 79  | <b>61</b>            | 136   | 147 | <b>96</b>            | 207   | 216 | <b>131</b>           | 247   | 255 |
| <b>27</b>            | 73    | 91  | <b>62</b>            | 136   | 151 | <b>97</b>            | 207   | 217 | <b>132</b>           | 249   | 253 |
| <b>28</b>            | 75    | 79  | <b>63</b>            | 146   | 150 | <b>98</b>            | 208   | 214 | <b>133</b>           | 249   | 254 |
| <b>29</b>            | 75    | 91  | <b>64</b>            | 147   | 150 | <b>99</b>            | 208   | 216 | <b>134</b>           | 249   | 255 |
| <b>30</b>            | 80    | 91  | <b>65</b>            | 147   | 151 | <b>100</b>           | 208   | 217 | <b>135</b>           | 255   | 267 |
| <b>31</b>            | 80    | 92  | <b>66</b>            | 148   | 151 | <b>101</b>           | 211   | 216 | <b>136</b>           | 256   | 267 |
| <b>32</b>            | 84    | 91  | <b>67</b>            | 152   | 161 | <b>102</b>           | 211   | 217 | <b>137</b>           | 257   | 267 |
| <b>33</b>            | 92    | 99  | <b>68</b>            | 152   | 164 | <b>103</b>           | 212   | 216 | <b>138</b>           | 258   | 267 |
| <b>34</b>            | 92    | 101 | <b>69</b>            | 153   | 164 | <b>104</b>           | 217   | 220 |                      |       |     |
| <b>35</b>            | 92    | 102 | <b>70</b>            | 162   | 167 | <b>105</b>           | 217   | 225 |                      |       |     |

## SUPPLEMENTAL FIGURE LEGENDS

**Figure S1: Heat map representation of cross-competition ELISA with panel of murine RTA-specific mAbs.** As described in the Materials and Methods, the panel of 10 RTA-specific murine mAbs were subjected to cross competition ELISAs. The capture mAbs (vertical axis) were coated onto 96 well microtiter plates then assessed for the ability to capture biotin-tagged ricin in the presence of competitor mAbs (horizontal axis). The percent (%) inhibition of biotin-ricin binding to the capture mAb in the presence of a competitor mAb was calculated from the optical density (OD) values as follows:  $1 - \frac{\text{value OD}_{450} (\text{biotin-ricin} + \text{competitor mAb})}{\text{value OD}_{450} (\text{biotin-ricin without competitor mAb})} \times 100$ . The values were translated to a heat map using Prism 7 (GraphPad). The scale bar on the right indicates percent inhibition from black (0%) to dark red (100%). The heat map is presented as a means of visualizing the relative competition groups or clusters (I-IV) referred to in the body of the manuscript.

**Figure S2. Positioning WECEB2's epitope on RiVax.** Intermediate regions of protection associated with WECEB2 binding to RiVax, as in Figure 3. The side chains of amino acid residues associated with strong (dark blue) intermediate protection by WECEB2 are shown as sticks. The side chains from intermediate protected residues that could contact the strongly protected region based on proximity (<1 angstrom) are colored red.  $\alpha$ -helix B and  $\beta$ -strand h are labelled.



FIGURE 2

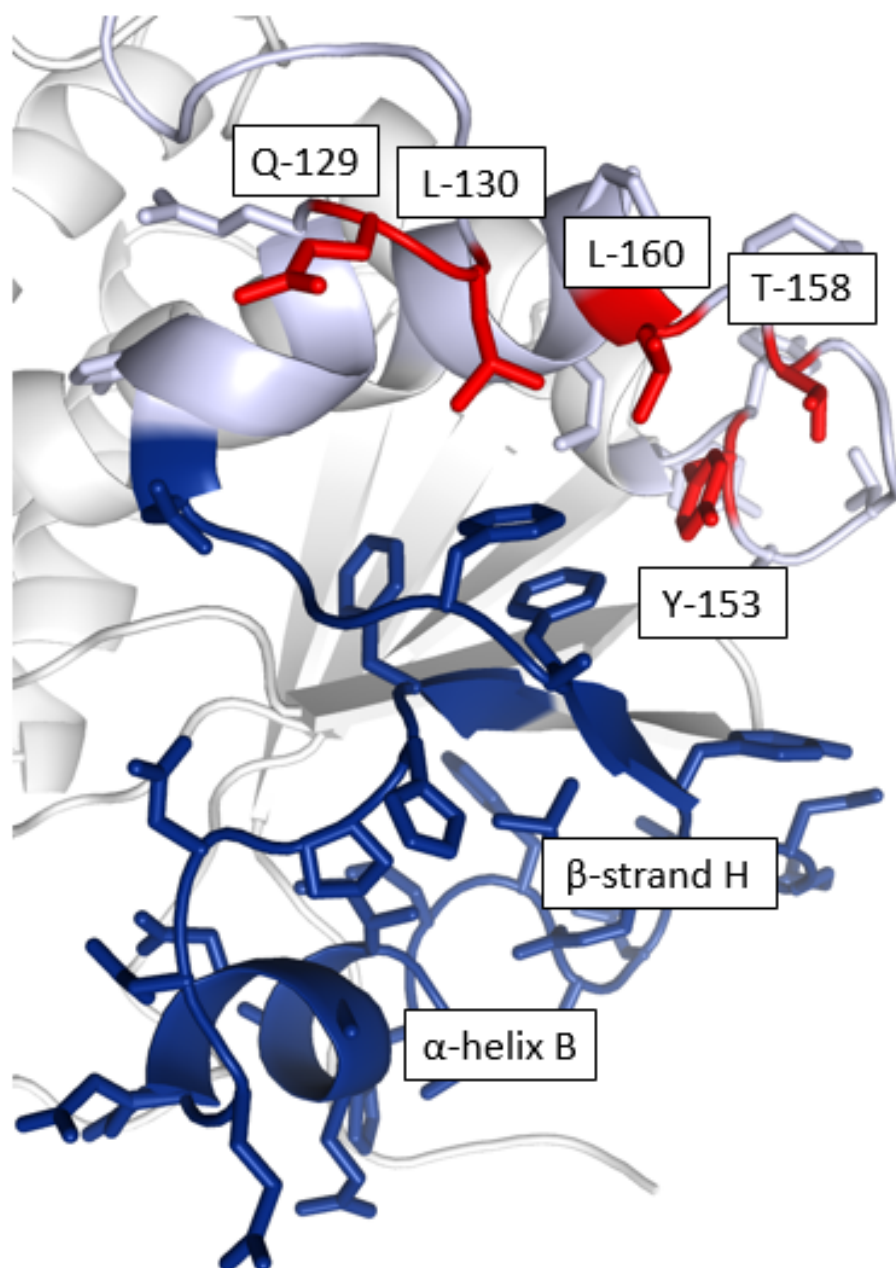

Supplement: CVI.00237-17_zcd012175553s1.pdf [file CVI.00237-17_zcd012175553s1.pdf]
